# Supplementary material for: Crossiella, a Rare Actinomycetota Genus, Abundant in the Environment
Source: MDPI journal article supplement (doi:10.3390/applbiosci2020014), 2023-05-06
Supplement: s1 [file s1]

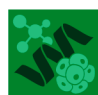

Supplementary

# Crossiella, a Rare Actinomycetota Genus, Abundant in the Environment

Tamara Martin-Pozas <sup>1,†</sup>, Jose Luis Gonzalez-Pimentel <sup>2,†</sup>, Valme Jurado <sup>3</sup>, Leonila Laiz <sup>3</sup>, Juan Carlos Cañaveras <sup>4</sup>, Angel Fernandez-Cortes <sup>5</sup>, Soledad Cuezva <sup>6</sup>, Sergio Sanchez-Moral <sup>1</sup> and Cesareo Saiz-Jimenez <sup>3,\*</sup>

<sup>1</sup> Museo Nacional de Ciencias Naturales, MNCN-CSIC, 28006 Madrid, Spain;

tmpozas@mncn.csic.es (T.M.-P.); ssmilk@mncn.csic.es (S.S.-M.)

<sup>2</sup> Centro Andaluz de Biología del Desarrollo (CABD, UPO-CSIC-JA), Facultad de Ciencias Experimentales, Departamento de Genética, Universidad Pablo de Olavide, 41013 Sevilla, Spain; jlgonpim@upo.es

<sup>3</sup> Instituto de Recursos Naturales y Agrobiología, IRNAS-CSIC, 41012 Sevilla, Spain;

jurado@irnase.csic.es (V.J.); leo@irnase.csic.es (L.L.)

<sup>4</sup> Departamento de Ciencias de la Tierra y del Medio Ambiente, Universidad de Alicante,

03080 Alicante, Spain; jc.canaveras@ua.es

<sup>5</sup> Departamento de Biología y Geología, Universidad de Almería, 04120 Almería, Spain; acortes@ual.es

<sup>6</sup> Departamento de Geología, Geografía y Medio Ambiente, Universidad de Alcalá, 28802 Alcalá de Henares, Spain; soledad.cuezva@uah.es

\* Correspondence: saiz@irnase.csic.es

† These authors contributed equally to this work.

**Table S1.** Occurrence of the genus *Crossiella* in different environments.

| Soils                                                            | Locations                                                   | References |
|------------------------------------------------------------------|-------------------------------------------------------------|------------|
| Soil                                                             | Barton Road Ecological Research Area, Pocatello, USA        | [58]       |
| Soil                                                             | Ekiti State, Southwestern, Nigeria                          | [6]        |
| Soil                                                             | Mayotte Island, Comoros, Africa                             | [59]       |
| Soil                                                             | Antarctica                                                  | [60]       |
| Soil                                                             | Wangcheng, Changsha, China                                  | [61]       |
| Soil                                                             | Hexi Corridor, Black Gobi region, China                     | [62]       |
| Soil                                                             | Botucatu, Sao Paulo State, Brazil                           | [63]       |
| Soil                                                             | Tibetan Plateau, China                                      | [64]       |
| Soil                                                             | Mu Us Sandy Land, China                                     | [65]       |
| Soil                                                             | Qinghai-Tibet Plateau, China                                | [66]       |
| Soil                                                             | Atacama Desert, Chile                                       | [67]       |
| Soil                                                             | Wenchuan, Sichuan, China                                    | [68]       |
| Soil                                                             | Herring Island, East Antarctica                             | [69]       |
| Soil                                                             | Florida, USA                                                | [70]       |
| Soil                                                             | Not reported                                                | [71]       |
| Soil                                                             | Not reported                                                | [72]       |
| Soil                                                             | Yujiagong Village, Shaanxi, China                           | [73]       |
| Soil                                                             | Different German regions                                    | [74]       |
| Soil                                                             | Weizhou and Xieyang Islands, China                          | [75]       |
| Soil                                                             | Meizhou City, Guangdong, China                              | [76]       |
| Permafrost                                                       | Edmonson Point, Antarctica                                  | [77]       |
| Permafrost                                                       | Muot da Barba Peider, Switzerland                           | [78]       |
| Metal contaminated soils                                         | Greater Sudbury Region, Canada                              | [79]       |
| Contaminated soil                                                | Farmland, Hunan, China                                      | [80]       |
| Fertilized soils                                                 | Jilin Province, China                                       | [81]       |
| Forest soil                                                      | Songshan Reserve, Beijing, China                            | [82]       |
| Forest of <i>Pinus</i> spp. and <i>Populus canadensis</i>        | Fujia forest farm, Changtu County, Liaoning Province, China | [83]       |
| Soils restored with <i>Pinus</i> spp., <i>Populus canadensis</i> | Fujia forest farm, Changtu County, Liaoning Province, China | [84]       |

|                                                                                                              |                                                          |       |
|--------------------------------------------------------------------------------------------------------------|----------------------------------------------------------|-------|
|                                                                                                              |                                                          |       |
| Root-associated soils                                                                                        | Grasslands, Tibetan Plateau, China                       | [85]  |
| Grassland                                                                                                    | Tibetan Plateau, China                                   | [86]  |
| Mountain soil                                                                                                | Taylor Valley, Antarctica                                | [87]  |
| Degraded limestone soils                                                                                     | Almería, Spain                                           | [88]  |
| Sahara dust                                                                                                  | Mont Blanc glacier, France                               | [89]  |
| Karst rocky desert areas                                                                                     | Mengzi, China                                            | [90]  |
| Salar de Tara                                                                                                | Atacama Desert, Chile                                    | [91]  |
| Volcanic soils                                                                                               | Fogo Island, Cape Verde Archipelago                      | [92]  |
| Forest soils                                                                                                 | Baotou City, Inner Mongolia                              | [93]  |
| Plastisphere and soil                                                                                        | Panggezhuang, Beijing, China                             | [94]  |
| Plastics in soils                                                                                            | Nanquan Town, Shandong Province, China                   | [95]  |
| <i>Eucalyptus</i> plantation soils                                                                           | Zengcheng District, Guangzhou, China                     | [96]  |
| <b>Plant Rhizosphere</b>                                                                                     |                                                          |       |
| <i>Fragaria x ananassa</i>                                                                                   | ILVO in Merelbeke, Belgium                               | [97]  |
| <i>Agave lechuguilla</i>                                                                                     | Valle de Cuatro Ciénegas, Coahuila, México               | [98]  |
| <i>Zea mays</i>                                                                                              | Turin district, Italy                                    | [99]  |
| <i>Saccharum officinarum</i>                                                                                 | Dongsancun, Guandu Town, Shaoguan City, Guangdong, China | [100] |
| <i>Miscanthus</i> spp.                                                                                       | Nanyang city, Henan province, China                      | [101] |
| <i>Agave lechuguilla</i>                                                                                     | Valle de Cuatro Ciénegas, Coahuila, México               | [102] |
| <i>Bidens pilosa</i>                                                                                         | Greenhouse, Minas Gerais, Brasil                         | [103] |
| <i>Anthyllis cytisoides</i> , <i>Macrochloa tenacissima</i>                                                  | Semiarid grassland, Almeria, Spain                       | [104] |
| <i>Zea mays</i>                                                                                              | Hinterland of the Three Gorges Reservoir Area, China     | [105] |
| <i>Glycine max</i>                                                                                           | Mpumalanga Highveld region, South Africa                 | [106] |
| <i>Panax quinquefolius</i>                                                                                   | Farmlands, Houjia Town, Wendeng District, China          | [107] |
| <i>Cynodon dactylon</i> , <i>Xanthium sibiricum</i> , <i>Echinochloa crusgalli</i> , <i>Cyperus rotundus</i> | Baijiayi riparian zone, China                            | [108] |
| <i>Dendrobium</i> spp.                                                                                       | Anhui Tongjisheng Biotechnology Company, Lu'an, China    | [109] |
| <i>Mesembryanthemum</i> spp.                                                                                 | Institute of Modern Agriculture, Dongying, China         | [110] |
| <i>Panax ginseng</i>                                                                                         | Jilin Province, China                                    | [111] |
| <i>Pennisetum ciliare</i>                                                                                    | Rancho Diamante, Sonora, Mexico                          | [112] |
| <i>Arabidopsis halleri</i>                                                                                   | Southern Poland                                          | [113] |
| <i>Boehmeria nivea</i>                                                                                       | Xikuangshan Sb mine, Hunan, China                        | [114] |
| <i>Spartocytisus supranubius</i>                                                                             | Teide National Park, Tenerife, Spain                     | [115] |
| <i>Myrica rubra</i>                                                                                          | Majian Town, Lanxi City, China                           | [116] |
| Different shrub species                                                                                      | Boyd Deep Canyon Desert Research Center, CA, USA         | [117] |
| <i>Carica papaya</i>                                                                                         | Fujian Agriculture and Forestry University, China        | [118] |
| <i>Piper nigrum</i>                                                                                          | Dak Lak and Dak Nong provinces, Vietnam                  | [119] |
| <b>Mines</b>                                                                                                 |                                                          |       |
| Restored soils in an open-cut magnesite mine                                                                 | Haicheng city, Liaoning Province, China                  | [120] |
| Post-coal-mining reclamation soil                                                                            | Emalahleni Highveld, Mpumalanga province, South Africa   | [121] |
| Gold mine                                                                                                    | Lead, South Dakota, USA                                  | [122] |
| Marsberg Copper Mine                                                                                         | Marsberg, Germany                                        | [123] |
| Mining wastes                                                                                                | Hnúšť'a, Slovakia                                        | [7]   |
| Contaminated soil                                                                                            | Mining area, Zhejiang Province, China                    | [124] |
| <b>Stone/Buildings</b>                                                                                       |                                                          |       |
| Tomba del Colle                                                                                              | Chiusi, Italy                                            | [125] |
| Wall paintings                                                                                               | Kalliroi's Fountain, Greece                              | [126] |
| Ancient painted sculptures                                                                                   | Majjishan Grottoes, China                                | [127] |
| Klippe Buddhist statues                                                                                      | Hangzhou, China                                          | [128] |
| Stone monuments                                                                                              | Hangzhou, China                                          | [129] |
| Sandstones                                                                                                   | Angkor Thom and Beng Mealea, Cambodia                    | [130] |
| Sandstone/mortar                                                                                             | Wawel Royal Castle, Krakow, Poland                       | [131] |

---

|                                     |                                                   |       |
|-------------------------------------|---------------------------------------------------|-------|
| Maya stone/plaster                  | Archeological Maya site of Copan, Honduras        | [132] |
| Calcareous stones                   | Roman ruins (Algeria and Tunisia)                 | [133] |
| Lede stone                          | Castle of Berlare, Belgium                        | [134] |
| Jinsha earthen relic                | Archeological Jinsha Site, Chengdu Plain, China   | [135] |
| Limestone                           | Old cathedral of Coimbra, Portugal                | [136] |
| Thyssen Museum                      | Malaga, Spain                                     | [32]  |
| Limestones                          | Anavarza archeological site, Adana, Turkey        | [137] |
| Mural painting                      | Sean Khan temple, Thailand                        | [138] |
| <b>Others Sites</b>                 |                                                   |       |
| Sea sediments                       | Southwest Indian Ridge                            | [139] |
| Book front cover                    | Book collections from Poland and Czech Republic   | [140] |
| Sea sediments                       | Oman Sea, Hormozgan province, Iran                | [141] |
| Drinking water                      | Flanders, Belgium                                 | [142] |
| Water and biofilms                  | Can Verdaguer, Spain                              | [143] |
| Bryophyte crusts                    | Karst rocky desert areas, Guizhou Province, China | [144] |
| Synthesis of polyenes               | <i>Crossiella cryophila</i>                       | [145] |
| <i>Ruditapes philippinarum</i> clam | Dandong City, Liaoning Province, China            | [146] |

---
